# Supplementary material for: A reliable and accurate UHPLC-MS/MS method for screening of Aspergillus, Penicillium and Alternaria mycotoxins in orange, grape and apple juices
Source: Royal Society of Chemistry journal article supplement (doi:10.1039/d0ay01787f), 2020-10-27
Supplement: d0ay01787f1.pdf [file d0ay01787f1.pdf]

1 **A Reliable and Accurate UHPLC-MS/MS Method for**  
2 **Screening of *Aspergillus*, *Penicillium* and *Alternaria***  
3 **mycotoxins in Orange, Grape and Apple Juices**

4  
5 **Wenbo Guo<sup>1,†</sup>, Junhua Yang<sup>1,†</sup>, Xueke Niu<sup>1</sup>, Emmanuel K. Tangni<sup>2</sup>, Zhihui**  
6 **Zhao<sup>1</sup>, Zheng Han<sup>1,\*</sup>**

7  
8 <sup>1</sup> Institute for Agro-food Standards and Testing Technology, Shanghai Key  
9 Laboratory of Protected Horticultural Technology, Shanghai Academy of  
10 Agricultural Sciences, Shanghai 201403, China

11 <sup>2</sup> Organic Contaminants and Additives, Sciensano, Leuvensesteenweg 17, Tervuren 3080,  
12 Belgium; emmanuel.tangni@sciensano.be

13  
14 \*Correspondence: hanzheng\_ok@163.com

15 † These authors contributed equally to this work.

16

17

18

19

20

21

22

23

24

25

26

1 **Figure Captions**

2

3 **Figure S1.** Comparison of the separation and ionization efficiencies of OTA and AFB<sub>1</sub> between two  
4 candidate mobile phases: (A) acetonitrile-water; (B) methanol-water. The concentrations were 5 ng  
5 mL<sup>-1</sup> for AFB<sub>1</sub> and 20 ng mL<sup>-1</sup> for OTA, respectively.

6

7 **Figure S2.** Comparison of the separation and ionization efficiencies of ALS, PAT, TeA and CIT  
8 between two candidate mobile phases: (A) methanol-water containing 0.1% formic acid; (B) methanol-  
9 water containing 5 mmol L<sup>-1</sup> ammonium acetate. The concentrations were 50 ng mL<sup>-1</sup> for ALS and 20  
10 ng mL<sup>-1</sup> for PAT, TeA and CIT, respectively.

11

12

13

14

15

16

17

18

19

20

21

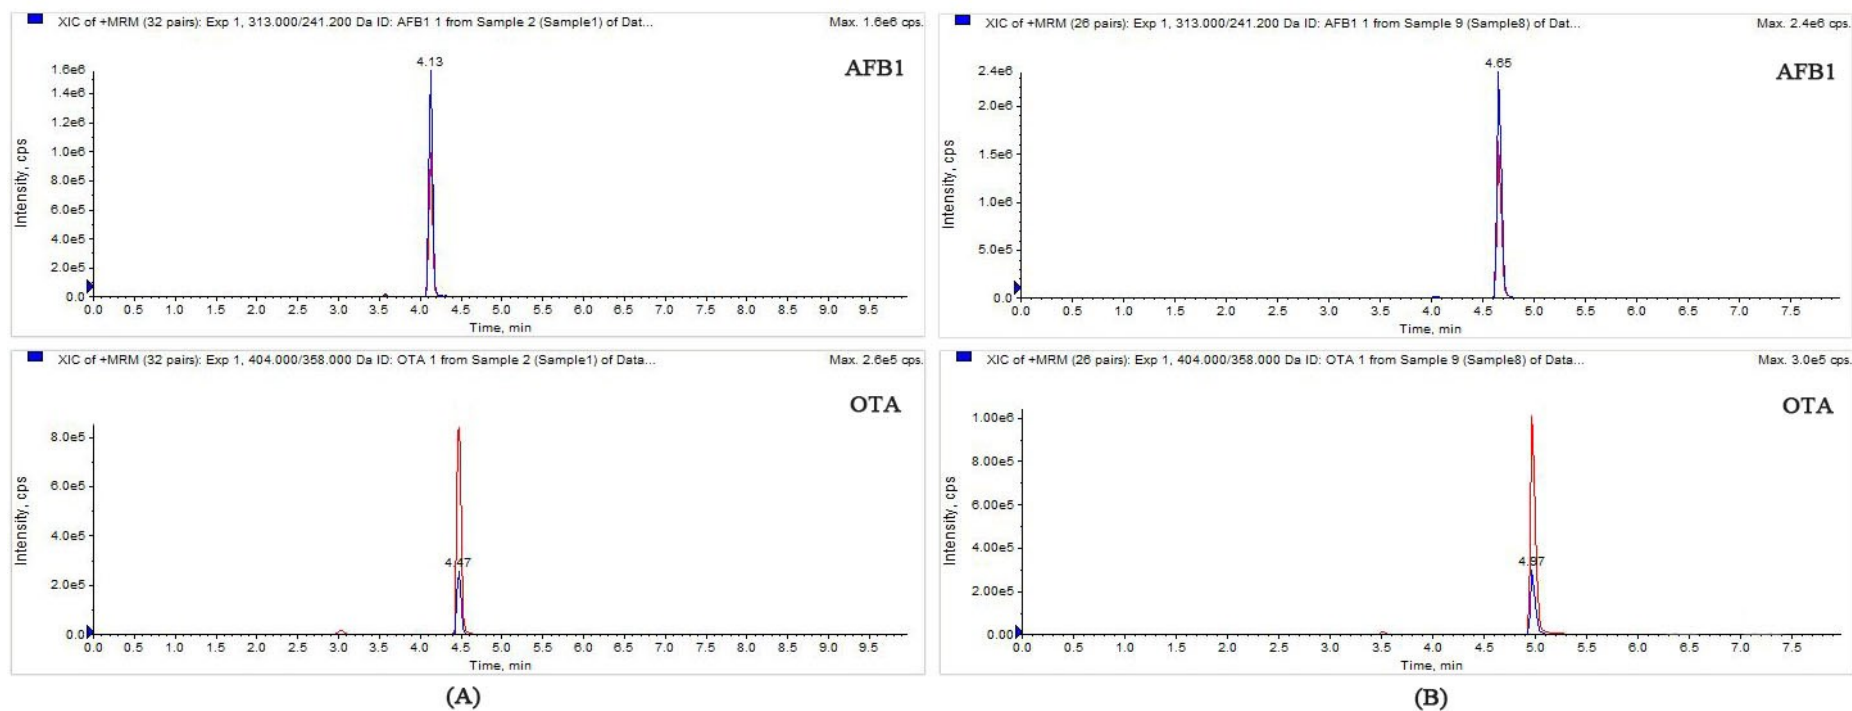

1

2 **Figure S1.** Comparison of the separation and ionization efficiencies of OTA and AFB<sub>1</sub> between two candidate mobile phases: (A) acetonitrile-water; (B) methanol-water.

3 The concentrations were 5 ng mL<sup>-1</sup> for AFB<sub>1</sub> and 20 ng mL<sup>-1</sup> for OTA, respectively.

4

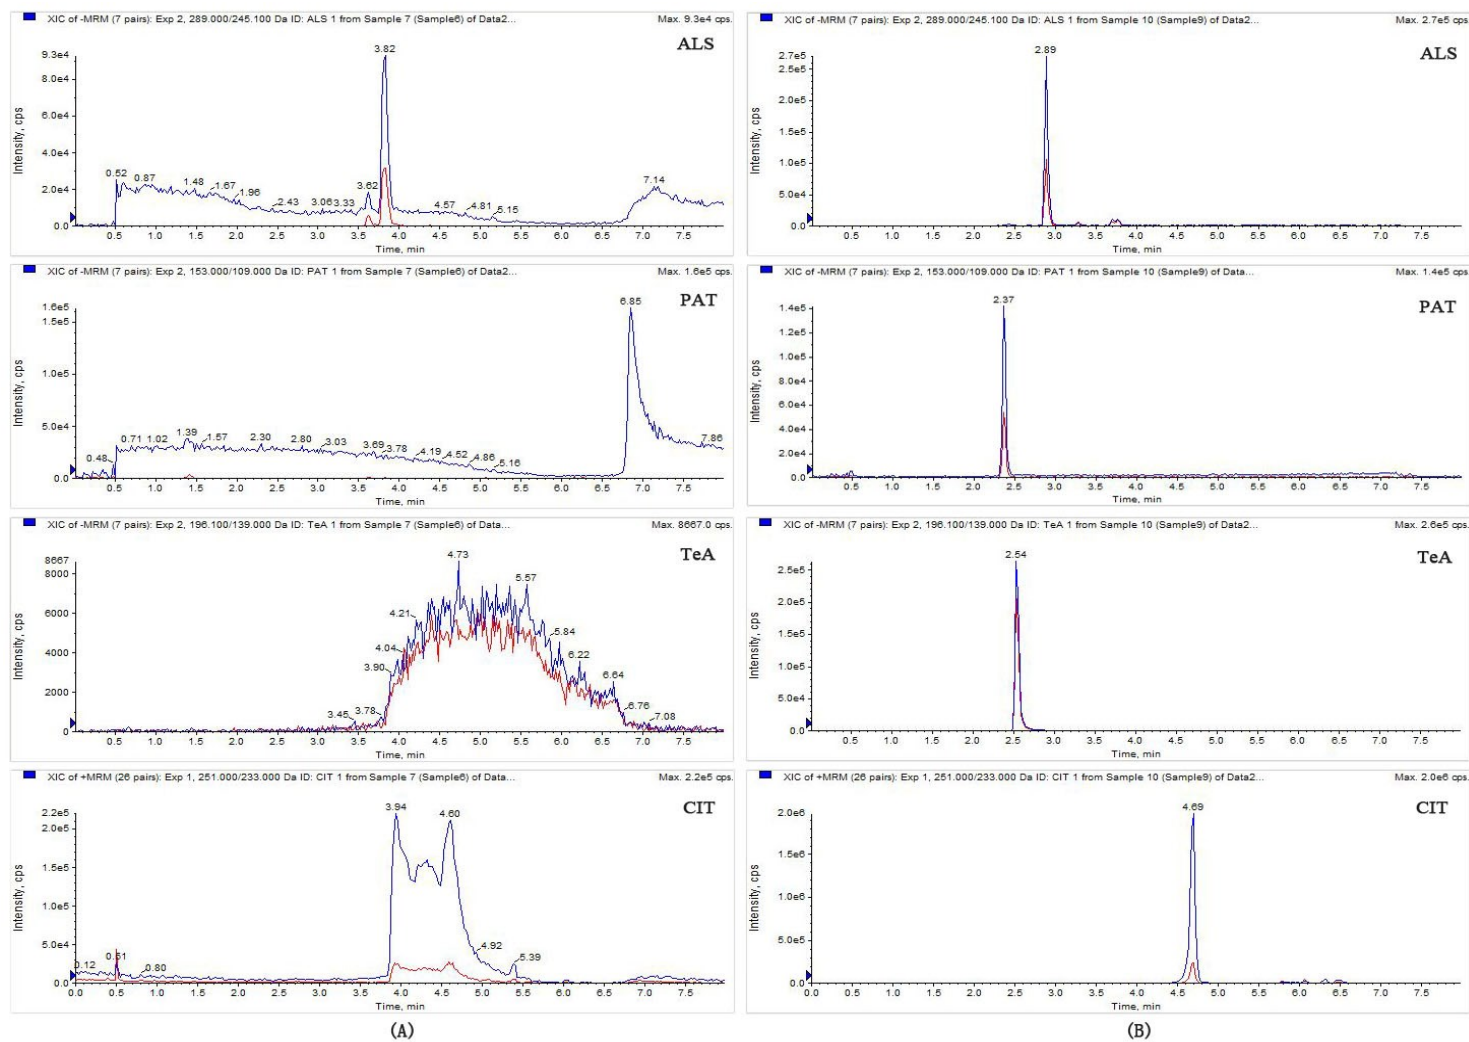

1 **Figure S2.** Comparison of the separation and ionization efficiencies of ALS, PAT, TeA and CIT between two candidate mobile phases: (A) methanol-water  
2 containing 0.1% formic acid; (B) methanol-water containing 5 mmol L<sup>-1</sup> ammonium acetate. The concentrations were 50 ng mL<sup>-1</sup> for ALS and 20 ng mL<sup>-1</sup> for  
3 PAT, TeA and CIT, respectively.
